# Supplementary material for: Variation of miRNA Content in Cow Raw Milk Depending on the Dairy Production System
Source: MDPI journal article supplement (doi:10.3390/ijms231911681), 2022-10-02
Supplement: s1 [file s1]

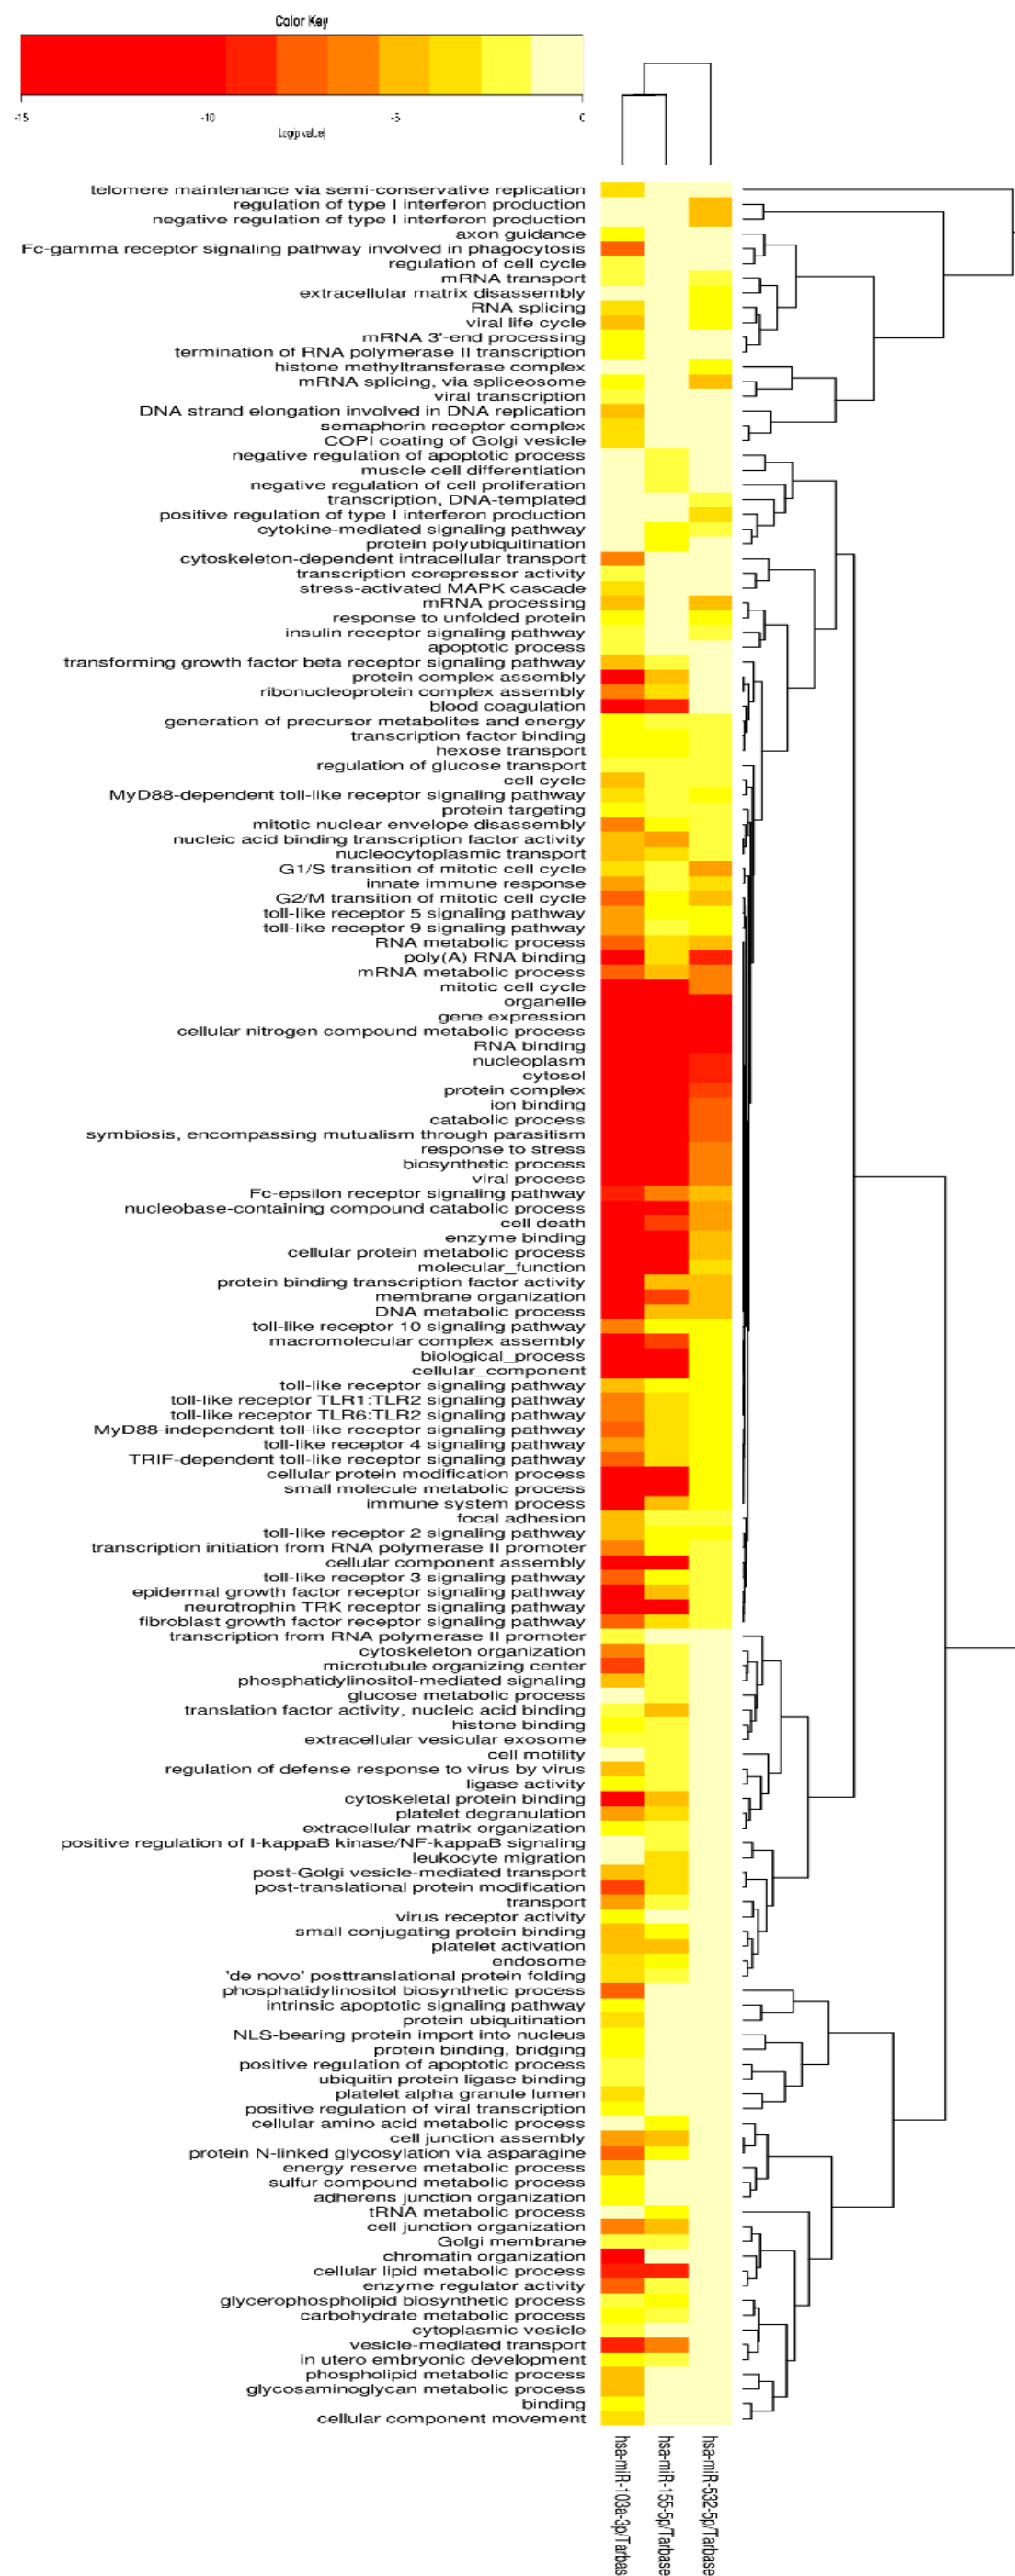

**Supplementary figure S1.** Heatmap of hierarchical clustering of *miR-103*, *miR-155* and *miR-532* based on mRNA target pathways, identified in DIANA using the Tarbase and GO intersection representation. Darker colors represent lower p-values.
